# Supplementary material for: Frustration in Fuzzy Protein Complexes Leads to Interaction Versatility
Source: J Phys Chem B. 2021 Mar 5;125(10):2513–20. doi: 10.1021/acs.jpcb.0c11068 (PMC8041309; doi:10.1021/acs.jpcb.0c11068)
Supplement: Supplementary file 2 — jp0c11068_si_002.xlsx [file jp0c11068_si_002.xlsx]

## Sheet: TableS1
Uniprot	Start AA (Uniprot_Numbering)	End AA (Uniprot_Numbering)	Start AA (PDB_Numbering)	End AA (PDB_Numbering)	Reference PDB	PDB complex	PDB monomer
A0QTN8	17	27	17	27	3DG7_B	3DG7_B 3DG7_D	3DG3_A
A5HZZ9	245	249	245	249	3DS9_A	3DS9_A	3DSE_A
D0EM60	515	522	515	522	5F55_A	5F55_A 5F56_A	5F54_A
F1RQI7	175	179	175	179	4E7Z_B	4E7Z_B	4PFO_A 4PJM_A
I6Y9J2	308	319	308	319	4QRA_A	4QRA_A 4QRA_B	4QRB_A
O14757	74	81	74	81	1NVQ_A	1NVQ_A 1NVR_A 1NVS_A 2YDJ_A	2WMQ_A 2WMS_A 2YM4_A
O28126	89	95	89	95	1TFW_A	1TFW_A 1TFW_B 1TFW_C 1TFW_D 2DR5_A 2DR7_A 2DR9_A 2DRA_A 2DRB_A 2DVI_A 2ZH1_A 2ZH2_A 2ZH3_A 2ZH5_A 2ZH6_A 2ZH8_A 2ZH9_A 3OUY_B 2ZH7_A	1UET_A 1UEU_A 1UEV_A
O43924	111	116	111	116	5TB5_B	5TB5_B 5TB5_D 5E8F_A 5E8F_C 5F2U_A 5F2U_B 5TAR_B	5ML2_B 5ML8_B
O60341	460	474	460	474	2Y48_A	2Y48_A 5L3E_A 5LGT_A 2IW5_A 2UXN_A 2UXX_A 4XBF_A	2DW4_A 2EJR_A 2Z3Y_A 2H94_A 2Z5U_A
P00509	10	17	14	21	1ARG_A	1ARG_A 1ARG_B 1ASL_A 1ASL_B 1ASM_A 1ASM_B 1ASN_A 1ASN_B 1X28_A 1X28_B 1X29_A 1X29_B 1X2A_A 1X2A_B 5VWQ_A	2QA3_A 2QB2_A 2QB3_A
P00509	21	28	25	32	1ASM_B	1ASM_B	2QA3_A 2QB3_A
P00592	38	43	15	20	1HN4_A	1HN4_A 1HN4_B 1FX9_A 1FX9_B 1FXF_A 1FXF_B 1L8S_A 1L8S_B 3FVI_B 3FVI_C 3FVI_D	2B04_A
P00766	71	76	71	76	1T8L_A	1T8L_A 1T8L_C 3T62_A 4Q2K_D	1CHG_A
P02945	166	179	153	166	5VN7_B	5VN7_B 5VN9_A 5VN9_B	1M0L_A 5BR5_A 3MBV_A 2NTU_A 4MD1_A 5BR2_A 4MD2_A 4OV0_A 4X32_A 5A44_A 5A45_A
P03252	97	104	97	104	1AVP_A	1AVP_A 1NLN_A 4PID_A 4PIE_A 5FGY_A	4EKF_A
P05326	324	331	324	331	1IPS_A	1IPS_A 1IPS_B	1ODN_A
P06129	77	82	57	62	1UJW_A	1UJW_A	2GUF_A
P06129	594	601	574	581	1UJW_A	1UJW_A	2GUF_A
P06709	116	124	116	124	2EWN_A	2EWN_A 2EWN_B	1BIA_A 1BIB_A
P07737	57	62	56	61	2PAV_P	2PAV_P 2PBD_P 3CHW_P	4X1L_A
P08174	206	211	50	55	1H03_P	1H03_P 1H03_Q	1H2Q_P
P09651	94	99	95	100	1U1K_A	1U1K_A 1U1L_A 1U1M_A 1U1N_A 1U1O_A 1U1P_A 1U1Q_A 1U1R_A 1PGZ_A 1PO6_A 2UP1_A	1HA1_A 1L3K_A 1UP1_A
P0A7G6	158	165	157	164	3CMV_C	3CMV_C 3CMV_D 3CMV_F	1REA_A 2REB_A
P0A817	103	108	103	108	1P7L_A	1P7L_A 1P7L_B 1P7L_C 1P7L_D 1RG9_A 1RG9_B 1RG9_C 1RG9_D	1MXA_A 1MXB_A 1MXC_A 1XRA_A 1XRC_A
P11838	200	208	108	116	1EPL_E	1EPL_E 1EPM_E 1ER8_E 1GVU_A 1OEX_A 2ER0_E 2ER7_E 2ER9_E 3ER5_E 4ER4_E 4LP9_A	3Q6Y_A
P17169	603	609	602	608	2J6H_A	2J6H_A 2J6H_B	2VF4_X
P17291	147	151	147	151	1FJG_G	1FJG_G 1N32_G	1RSS_A
P19400	153	157	133	137	1F34_B	1F34_B	1F32_A
P19400	138	142	113	122	1F34_B	1F34_B	1F32_A
P20058	124	130	99	105	1QJS_B	1QJS_B	1QHU_A
P20783	180	185	42	47	3BUK_A	3BUK_A 3BUK_B	1B8K_A
P20783	198	203	60	65	3BUK_A	3BUK_A 3BUK_B	1B8K_A
P25685	336	340	336	340	3AGZ_A	3AGZ_A 3AGZ_B	2QLD_A
P29218	31	39	31	39	1IMA_A	1IMA_A 1IMA_B 1IMB_A 1IMB_B 1IMC_A 1IMC_B 1IMD_A 1IMD_B 1IME_A 1IME_B 4AS4_A 4AS4_B 1AWB_A 1AWB_B 2HHM_A 2HHM_B	1IMF_A
P35555	1539	1548	2539	2548	1UZJ_B	1UZJ_B	1UZK_A 1UZP_A 1UZQ_A
P40136	580	590	580	590	1K90_B	1K90_B	1K8T_A
P53779	71	75	71	75	4H3B_C	4H3B_C	3FI3_A
P53779	364	368	364	368	3V6R_B	3V6R_B 3V6S_B 3OXI_A 4H36_A 4H39_A 4H3B_A 4H3B_C	2O0U_A 2O2U_A 3DA6_A 3FI3_A 3KVX_A
P74873	220	224	220	224	1G4U_S	1G4U_S	1G4W_R
P74873	248	252	248	252	1G4U_S	1G4U_S	1G4W_R
P84022	324	328	323	327	1MK2_A	1MK2_A	1MJS_A
P84022	381	387	380	386	1MK2_A	1MK2_A	1MJS_A
P9WPN8	75	79	75	79	5LI6_A	5LI6_A 5LI6_B 5LI7_A 5LI7_B 5LIE_A 5LIE_B	5LI8_A
Q07960	403	412	206	215	1OW3_A	1OW3_A	1RGP_A
Q13325	190	195	190	195	4HOR_A	4HOR_A 4HOT_A	3ZGQ_A 4J0U_A
Q14012	278	293	278	293	4FG9_A	4FG9_A	4FG7_A
Q14671	1150	1165	1150	1165	1M8W_A	1M8W_A 1M8W_B 1M8X_A 1M8X_B 1M8Y_A 1M8Y_B 3Q0L_A 3Q0L_B 3Q0M_A 3Q0M_B 3Q0N_A 3Q0N_B 3Q0O_A 3Q0O_B 3Q0P_A 3Q0P_B	1IB2_A
Q45488	38	44	38	44	1D2I_A	1D2I_A 1D2I_B 1DFM_A 1DFM_B	1ES8_A
Q45488	115	122	115	122	1D2I_A	1D2I_A 1D2I_B 1DFM_A 1DFM_B	1ES8_A
Q60176	224	229	224	229	1HYG_A	1HYG_A 1HYG_B	1HYE_A
Q74P24	377	383	377	383	4EI7_A	4EI7_A	4EI8_A
Q84AF2	42	46	42	46	2P0J_A	2P0J_A 2P0J_B	1SDO_A
Q8RNV8	99	103	99	103	2Q10_A	2Q10_A 2Q10_B 3IMB_A 3IMB_B 3IMB_C 3IMB_D	2ODH_A
Q96S59	141	146	141	146	5JIU_A	5JIU_A 5JIU_B	5JI7_A
Q9K2N0	32	38	30	36	5ACV_A	5ACV_A 5ACV_B 5ACW_A 5ACW_B 5ACX_A 5ACX_B 5LM6_A 5LM6_B 5NHZ_A 5NHZ_B 5NI0_A 5NI0_E	5LCA_A 5LCF_A 5LCH_A
Q9X1H7	47	59	47	59	3PQC_A	3PQC_A	3PR1_A
B7TVP1	237	250	237	250	3GLM_A	3GLM_A 3GLM_B 3GLM_C 3GLM_D	3GF7_A
D7PC21	151	162	151	162	3OU6_A	3OU6_A 3OU6_B 3OU6_C 3OU6_D 3OU7_A 3OU7_B 3OU7_C 3OU7_D	3OU2_A
O07347	272	277	272	277	1O87_A	1O87_A 1O87_B 1OKK_A 2CNW_A 2CNW_B 2CNW_C 2J7P_A 2J7P_B	1LS1_A
O59282	26	32	26	32	3AEV_B	3AEV_B	2E3U_A
O76074	791	807	791	801	2H42_B	2H42_B 1UDU_A 1UDU_B	2H40_A 4MD6_A
P00797	353	361	282	290	2IKO_A	2IKO_A 2IKU_A 2IL2_A 2V0Z_C 2V16_C 3G72_B 3OOT_A 3OQF_A 3OQK_A 3Q3T_B 3Q4B_A 3Q4B_B 3Q5H_B 3SFC_A 3VSW_A 3VSX_A 3VUC_A 3VYD_A 3VYE_A 3VYF_A 4GJ5_B 4GJ6_B 4GJ7_A 4GJ8_B 4GJA_A 4GJB_B 4GJC_A 4GJD_A 4PYV_A 4Q1N_A 4RYC_A 4RYG_A 4RZ1_A 4S1G_A 4XX3_A 4XX4_A 5SY2_A 5SXN_A 5SY3_B 5SZ9_A 5T4S_A 1BIL_A 1BIM_A 1HRN_A 3GW5_B 3KM4_B 5KOQ_A 5KOS_A 5KOT_A 5TMG_A 5TMK_A 5V8V_B	2BKS_A 2BKS_B 2BKT_A 2BKT_B 2REN_A
P01112	66	71	66	71	1BKD_R	1BKD_R 1K8R_A 1NVV_R 1NVW_Q 1NVW_R 1WQ1_R 1XD2_B 4NYJ_R	1IOZ_A 2RGE_A 3RSL_A
P02754	169	178	153	162	2R56_A	2R56_A 2R56_B	1B8E_A
P02945	244	252	244	252	1CWQ_A	1CWQ_A 1CWQ_B	4MD1_A 4MD2_A 1XJI_A
P04547	68	76	68	76	1IXY_A	1IXY_A 1IXY_B 1M5R_A 1M5R_B 1SXP_A 1SXP_B 1SXQ_A 1SXQ_B	1BGT_A 2BGT_A 1BGU_A 2BGU_A 1C3J_A
P04547	108	122	108	122	1IXY_A	1IXY_A 1IXY_B 1M5R_A 1M5R_B 1SXP_A 1SXQ_A 1SXQ_B	1BGT_A 2BGT_A 1BGU_A 2BGU_A 1C3J_A
P06129	249	260	229	240	1UJW_A	1UJW_A	1NQE_A 3M8B_A 2GUF_A
P09527	65	71	65	71	1VG9_B	1VG9_B 1VG9_D 1VG9_F 1VG9_H	1VG1_A
P0A386	158	163	158	163	2AXT_V	2AXT_V 2AXT_v 5H2F_V 5H2F_v	1MZ4_A
P10824	10	31	11	32	1GP2_A	1GP2_A	1CIP_A
P11838	166	174	74	82	1EPL_E	1EPL_E 1EPM_E 1ER8_E 1GVU_A 1GVX_A 1OEX_A 2ER0_E 2ER6_E 2ER7_E 2ER9_E 3ER5_E 4ER2_E 4ER4_E 4LP9_A	3Q6Y_A 4YCY_A
P19821	504	512	504	512	3KTQ_A	3KTQ_A 3LWL_A 3LWM_A 3M8R_A 3M8S_A 3OJS_A 3OJU_A 3RR7_A 3RR8_A 3RRG_A 3RRH_A 3RTV_A 3SV3_A 3SV4_A 3SYZ_A 3SZ2_A 3T3F_A 4C8K_A 4C8L_A 4C8M_A 4C8N_A 4C8O_A 4CCH_A 4DF4_A 4DF8_A 4DFJ_A 4DFK_A 4DFM_A 4DFP_A 4DLG_A 4ELT_A 4ELU_A 4ELV_A 1QTM_A 4KTQ_A 2KTQ_A	1JXE_A 1KTQ_A 5KTQ_A
P20783	143	148	5	10	3BUK_A	3BUK_A 3BUK_B	1B8K_A 1NT3_A
P22301	56	62	38	44	1J7V_L	1J7V_L 1Y6K_L	1INR_A
P23470	292	297	292	297	5E5R_A	5E5R_A 5E5R_C	3JXH_C
P23940	79	91	79	91	1BHM_A	1BHM_A 1BHM_B 1ESG_A 1ESG_B 2BAM_A 2BAM_B 3BAM_A 3BAM_B	1BAM_A
P24941	147	159	147	159	1F5Q_A	1F5Q_A 1F5Q_C 1FIN_A 1FIN_C 1FVV_A 1FVV_C 1OKV_A 1OKV_C 1OKW_A 1OKW_C 1OL1_A 1OL1_C 1OL2_A 1OL2_C 1URC_A 1URC_C 2C5N_A 2C5N_C 2C5O_A 2C5O_C 2C5V_A 2C5V_C 2C5X_A 2C5X_C 2I40_A 2I40_C 2UUE_A 2UUE_C 2V22_A 2V22_C 2WEV_A 2WEV_C 2WFY_A 2WFY_C 2WHB_A 2WHB_C 2X1N_A 2X1N_C 3F5X_A 3F5X_C 4FX3_A 4FX3_C 5IF1_A 5IF1_C	1AQ1_A 2W05_A 1CKP_A 1KE6_A 4LYN_A 2R64_A 3S2P_A 2VTA_A 2VTH_A 1W0X_C 2W1H_A 1WCC_A 1DI8_A 5JQ8_A 2VTP_A 1DM2_A 2BHE_A 2BHH_A 2BTS_A 2J9M_A 2VTT_A 1FVT_A 5IEV_A 1KE8_A 3WBL_A 1G5S_A 5ANG_A 4BZD_A 1GIH_A 4BGH_A 1P2A_A 1H0W_A 1JVP_P 1KE5_A 1KE7_A 1KE9_A 2UZN_A 2VTI_A 1PYE_A 1R78_A 5FP6_A 2VTN_A 1VYZ_A 1Y91_A 2B52_A 2B55_A 2VTQ_A 2BTR_A 2DUV_A 2R3L_A 2VTJ_A 2VTO_A 2VTS_A 3FZ1_A 3LFN_A 2R3M_A 2R3J_A …
P28482	175	189	175	189	4XJ0_B	4XJ0_B	4FV4_A 4FV5_A 4FV6_A 4FV9_A 4FV8_A 5K4I_A
P28631	259	264	259	264	1JR3_E	1JR3_E	1A5T_A
P31570	184	196	184	196	1G64_A	1G64_A 1G64_B 4HUT_A 4HUT_B	1G5T_A
P36897	175	199	175	199	1B6C_B	1B6C_B 1B6C_D 1B6C_F 1B6C_H 1IAS_A 1IAS_B 1IAS_C 1IAS_D 1IAS_E 3KCF_A 3KCF_B 3KCF_C 3KCF_D 3KCF_E	1PY5_A
P42700	336	340	336	340	2I91_A	2I91_A 2I91_B	1YVR_A
P49137	230	235	230	235	4TYH_A	4TYH_A 2PZY_A 3A2C_A 3A2C_B 3A2C_C 3A2C_D 3A2C_E 3A2C_F 3A2C_G 3A2C_H 3A2C_I 3A2C_J 3A2C_K 3A2C_L 3KC3_A 3KC3_B 3KC3_C 3KC3_D 3KC3_E 3KC3_F 3KC3_G 3KC3_H 3KC3_I 3KC3_J 3KC3_K 3KC3_L 3WI6_A 3WI6_B 3WI6_C 3WI6_D 3WI6_E 3WI6_F 3R2B_A 3R2B_B 3R2B_C 3R2B_D 3R2B_G	3R2Y_A
P52732	174	181	174	181	1II6_B	1II6_B 2GM1_B 2GM1_D 2PG2_A 2PG2_B 2UYI_A 2UYI_B 2UYM_A 2UYM_B 2X2R_A 2X2R_B 2X2R_C 2XAE_A 2XAE_B 2XAE_C 3K5E_A 3K5E_B 3L9H_A 3L9H_B 4A51_C 4A51_D 4A51_G 4A5Y_A 4A5Y_C	3ZCW_A
P71707	780	785	638	643	5CRF_A	5CRF_A 5CRF_B 5CRF_C 5CRF_D	5CXW_A
P74873	196	206	196	206	1G4U_S	1G4U_S	1G4W_R
Q00987	6	11	6	11	4HBM_A	4HBM_A 4HBM_B	4ODF_A 4OGT_A 4OGN_A
Q09028	16	23	16	23	4PBY_A	4PBY_A 4PBY_B 4PBZ_A 4PC0_A 4PC0_B	3GFC_A
Q12341	200	208	200	208	4PSW_A	4PSW_A	1BOB_A
Q16539	115	122	115	122	5ETA_A	5ETA_A 5ETA_B	1KV2_A 2YIS_A 2YIW_A 5N63_A 5N64_A 5N67_A
Q74P24	80	88	80	88	4EI7_A	4EI7_A	4EI8_A
Q8PJX9	429	434	429	434	4FOU_A	4FOU_A 4FOU_B	4FOJ_A
Q8WTS6	70	78	16	24	1H3I_A	1H3I_A 1H3I_B	1N6C_A
Q9CCZ4	58	69	58	69	2CKD_B	2CKD_B	2UYO_A 2UYQ_A
Q9U1E1	145	150	145	150	3NGS_B	3NGS_B 3NGT_A 3NGT_B 3NGT_C 3NGT_D 3NGT_E 3NGT_F 3NGT_G 3NGT_H 3NGT_I 3NGT_J 3NGT_K 3NGT_L	3NGR_A
Q9Y5B9	745	750	745	750	4Z2M_B	4Z2M_B	4Z2N_A

## Sheet: TablesS2
Uniprot	Start AA (Uniprot_Numbering)	End AA (Uniprot_Numbering)	Start AA (PDB_Numbering)	End AA (PDB_Numbering)	Reference PDB	PDB complex, structured	PDB monomer
C8CHL4	2	18	2	18	3ZN5_A	3ZN5_A 3ZN5_B 3ZN5_C 3ZN5_D 3ZN5_E 3ZN5_F 3ZN5_G 3ZN5_H	3ZN4_A
O43189	322	326	322	326	5XFP_B	5XFP_B	5XFN_A
P00489	315	325	315	325	1PYG_A	1PYG_A 1PYG_B 1PYG_C 1PYG_D 3E3N_A 3E3N_B 3E3N_D 3E3N_F 3E3N_G 3E3N_H	1E1Y_A 2PYD_A 3CUV_A 2QRP_A 2QRQ_A 2QLM_A 3BCS_A 3BD7_A 3BD8_A 3BDA_A 4CTM_A 4CTN_A 4CTO_A 3CUT_A 3CUU_A 3CUW_A 3EBO_A 3EBP_A 4EJ2_A 4EKE_A 4EKY_A 4EL5_A 4EL0_A 3G2H_A 3G2I_A 3G2J_A 3G2K_A 3G2L_A 5JTT_A 5JTU_A 3L79_A 5LRC_A 5LRD_A 5LRE_A 5LRF_A 5MEM_A 4MHO_A 4MI3_A 4MIC_A 3MRT_A 3MRV_A 3MRX_A 4MRA_A 3MSC_A 3MS2_A 3MS4_A 3MT7_A 3MT8_A 3MT9_A 3MTA_A 3MTB_A 3MTD_A 3NC4_A 3NP7_A 3NP9_A 3NPA_A 5O50_A …
P00514	93	110	92	109	3FHI_B	3FHI_B	3IIA_A 3PLQ_A
P00797	232	237	160	165	1BIL_A	1BIL_A 1BIL_B 1BIM_A 1BIM_B 1HRN_A 1HRN_B 2IKO_A 2IKO_B 2IKU_A 2IKU_B 2IL2_A 2IL2_B 2V0Z_C 2V0Z_O 2V16_O 3G72_B 3OOT_A 3OOT_B 3OQF_A 3OQF_B 3OQK_A 3OQK_B 3SFC_A 3SFC_B 3VSW_A 3VSW_B 3VSX_A 3VSX_B 3VUC_A 3VUC_B 3VYD_A 3VYD_B 3VYE_A 3VYE_B 3VYF_B 4GJ7_A 4GJ7_B 4GJA_A 4GJA_B 4GJC_B 4GJD_A 4GJD_B 4PYV_B 4Q1N_A 4Q1N_B 4RYC_A 4RYC_B 4RYG_A 4RYG_B 4RZ1_B 4S1G_A 4S1G_B 4XX3_A 4XX3_B 4XX4_A 4XX4_B 5KOQ_A …	2BKS_A 2BKS_B 2BKT_A 2BKT_B 2REN_A 2V13_A 4AMT_A
P02768	101	113	77	89	3A73_A	3A73_A 3LU6_A 3LU7_A 3LU7_B 3LU8_A 3LU8_B 4EMX_A 4EMX_B 5ID7_A	1HK1_A 4IW1_A 4E99_A 5IJF_A
P07024	324	329	324	329	1HPU_B	1HPU_B 1HPU_C 2USH_B	1USH_A
P08254	242	247	242	247	1G4K_A	1G4K_A 1QIC_D 2D1O_A 2D1O_B	3OHL_A 3OHO_A
P0A3F4	37	53	37	53	2V5H_G	2V5H_G 2V5H_H 2V5H_I 2V5H_J 2V5H_K 2V5H_L	4C3L_A
P0A6Z6	63	78	63	78	1Q5Y_A	1Q5Y_A 1Q5Y_B 1Q5Y_C 1Q5Y_D 3BKT_A 3BKT_B 3BKT_C 3BKT_D 3BKU_A 3BKU_B 3BKU_C	3BKF_A
P12004	186	192	186	192	1UL1_B	1UL1_B 1UL1_C 1VYJ_C 1VYJ_E 1VYJ_I 1VYJ_K 1VYM_B 4ZTD_A 4ZTD_B 5MLW_A 5MLW_E	3VKX_A
P13298	110	115	109	114	2PS1_A	2PS1_A 2PS1_B	2PRY_A
P13482	32	36	32	36	2JJB_A	2JJB_A 2JJB_B 2JJB_D 2WYN_A 2WYN_B 2WYN_D	2JF4_A 2JG0_A
P24941	38	46	38	46	1F5Q_A	1F5Q_A 1F5Q_C 1FIN_A 1FIN_C 1FVV_A 1FVV_C 1OKV_A 1OKV_C 1OKW_A 1OKW_C 1OL1_A 1OL1_C 1OL2_A 1OL2_C 1URC_A 1URC_C 2C5N_A 2C5N_C 2C5O_A 2C5O_C 2C5V_A 2C5V_C 2C5X_A 2C5X_C 2I40_A 2I40_C 2UUE_A 2UUE_C 2V22_A 2V22_C 2WEV_A 2WEV_C 2WFY_A 2WFY_C 2WHB_A 2WHB_C 2X1N_A 2X1N_C 3F5X_A 3F5X_C 4FX3_A 4FX3_C 5IF1_A 5IF1_C	1AQ1_A 1B38_A 1B39_A 1CKP_A 3IG7_A 3IGG_A 1PXK_A 1PXL_A 1PXM_A 2R64_A 3S2P_A 2VTL_A 2VTM_A 2VTP_A 2VTI_A 1DI8_A 1DM2_A 4BGH_A 2BHE_A 2BHH_A 5JQ8_A 3LE6_A 2UZN_A 1FVT_A 4ACM_A 2C6L_A 3FZ1_A 1H0V_A 1H0W_A 1JVP_P 1KE5_A 1KE6_A 1KE7_A 1KE8_A 1KE9_A 2R3L_A 2R3M_A 2R3N_A 2R3O_A 2R3P_A 2R3R_A 2R3F_A 2R3H_A 2R3I_A 2R3J_A 2R3K_A 2VTO_A 1W0X_C 1G5S_A 5ANK_A 5ANI_A 2BTS_A 1H01_A 5JQ5_A 3LFQ_A 2R3Q_A 2R3G_A …
P31570	7	26	207	226	1G64_B	1G64_B	1G5T_A
P33284	2	16	2	16	3O08_B	3O08_B 3O1W_A 3O1W_B 3O4W_A 3O4W_B 3O5B_A 3O5B_B	3O1B_A 3O80_A 3O8M_A
P37231	293	301	265	273	2ATH_B	2ATH_B 2F4B_B 2G0G_B 2HWQ_B 2HWR_B 3GBK_B 3NOA_B	3R5N_A
P42336	940	948	940	948	4L1B_A	4L1B_A 4L23_A 4L2Y_A	3ZIM_A 5DXT_A 5UBR_A
P49137	265	274	265	274	2PZY_C	2PZY_C 2PZY_D 3A2C_A 3A2C_B 3A2C_C 3A2C_D 3A2C_E 3A2C_F 3A2C_H 3A2C_I 3A2C_J 3A2C_K 3A2C_L 3KC3_A 3KC3_D 3KC3_E 3KC3_F 3KC3_H 3KC3_I 3KC3_K 3KC3_L 4TYH_A	1NY3_A 3R2Y_A
P49137	346	364	346	364	2PZY_C	2PZY_C 3KC3_B 3KC3_F 3KC3_H 3KC3_I 4TYH_A	1NY3_A 3R2Y_A
P53350	495	506	495	506	1Q4K_C	1Q4K_C 3HIH_A 4HAB_A	2OGQ_A
P56817	218	230	205	217	1M4H_A	1M4H_A 1SGZ_C 1SGZ_D 1XN2_A 1XN3_B 1XN3_C 5V0N_B 5V0N_C	4B0Q_A 4B78_A 4EWO_A 4EXG_A
P61823	42	49	16	23	1A2W_A	1A2W_A 1A2W_B 1AFK_B 1AFL_B 1AFU_B 1DFJ_E 1EOS_B 1JN4_B 1JVT_B 1JVU_B 1JVV_B 1O0F_B 1O0H_B 1O0M_B 1O0N_B 1O0O_B 1QHC_B 1RBB_A 1U1B_B 1W4O_B 1W4P_B 1W4Q_B 1XPS_A 1XPT_A 1Z6D_B 1Z6S_B 2G4W_B 2G8Q_B 2G8R_B 2P42_A 2P42_C 2W5G_B 2W5I_B 2W5K_B 2W5L_B 2W5M_B 2XOG_B 3D6O_B 3D6P_B 3D6Q_B 3D7B_B 3D8Y_B 3D8Z_B 3DXG_B 3DXH_B 3EUX_B 3EUY_B 3EUZ_B 3EV0_B 3EV1_B 3EV2_B 3EV3_B 3EV4_B 3EV5_B 3EV6_B 3JW1_B 4G8V_B …	1RNU_A 1RNV_A 2RNS_A
P68135	40	67	438	465	1IJJ_B	1IJJ_B 1RGI_A 2A40_A 2A40_D 2FF6_A 2Q1N_B 3FFK_B 3FFK_E 4B1V_B 4K42_A 4K42_B 4PKG_A 4PKH_A 4PKH_D 4PKH_F 4PKI_A 4PL8_A 4Z94_A	3M6G_A 3M6G_B 1RDW_X 2A5X_A 2ASM_A 2ASP_A 4K41_A 2Q0R_A 2Q36_A 3HBT_A
P98170	347	356	347	356	2OPZ_A	2OPZ_A 2OPZ_B 2OPZ_C 2OPZ_D	2JK7_A
P9WPN8	179	192	179	192	5LIE_B	5LIE_B	5LI8_A
Q02248	134	161	134	161	1I7W_A	1I7W_A 1I7W_C 1I7X_C	4EV8_A 4EV9_A 4EVP_A 4EVT_A
Q06187	545	556	545	556	1K2P_A	1K2P_A 1K2P_B 3P08_B 5J87_A 5J87_C	5FBO_A
Q09028	89	113	89	113	4PBY_B	4PBY_B 4PC0_A 4PC0_B	3GFC_A
Q09028	353	360	353	360	4PBY_A	4PBY_A 4PBY_B 4PBZ_A 4PC0_A 4PC0_B	3GFC_A
Q14012	172	179	172	179	4FG8_B	4FG8_B	4FG7_A
Q4U1A6	354	380	354	380	3AGD_A	3AGD_A 3AGD_B 3AGE_A 3AGE_B	3IF5_A
Q57872	176	182	176	182	1PKH_A	1PKH_A 1PKJ_A 1PKK_A	2HXB_A
Q7KQK5	259	272	259	272	2Z8V_A	2Z8V_A 2Z8W_A 4R19_B	4R1B_A
Q84BQ9	97	101	97	101	3CJQ_A	3CJQ_A 3CJQ_D 3CJQ_G 3CJR_A 3EGV_A	1UFK_A 2ZBR_A 2NXC_A
Q980A5	39	47	39	47	3CW2_A	3CW2_A 3CW2_E 3CW2_F 3I1F_A 4M0L_A	4RD6_A
Q9U1E1	43	66	43	66	3NGS_C	3NGS_C 3NGT_A 3NGT_B 3NGT_C 3NGT_D 3NGT_E 3NGT_F 3NGT_G 3NGT_H 3NGT_I 3NGT_J 3NGT_K 3NGT_N	3NGR_A
A7ZS61	275	296	275	296	3GCM_A	3GCM_A 3GCM_B 3GCM_C	3GLL_A
O14757	2	8	2	8	1NVQ_A	1NVQ_A 1NVR_A 1NVS_A 2E9V_B 2YDJ_A	2WMQ_A 2WMR_A 2WMS_A 2WMV_A 2WMW_A 2WMX_A 2XEZ_A 2YM6_A 2YM7_A 2WMT_A 2YM8_A 2YM3_A 2YM5_A 2WMU_A 2X8E_A 2XEY_A 3U9N_A
O14965	279	290	279	290	4C3P_A	4C3P_A 4C3P_D	1MUO_A 3W16_A 4C3R_A
O50657	141	149	141	149	5GJM_A	5GJM_A	5GJN_A 5GJP_A
O95831	551	558	551	558	4BUR_A	4BUR_A 4BUR_B	1M6I_A 4BV6_A
P00489	7	12	7	12	1PYG_A	1PYG_A 1PYG_C 1PYG_D 3E3L_A 3E3L_B 3E3L_C 3E3L_D 3E3N_A 3E3N_B 3E3N_C 3E3N_D 3E3N_E 3E3N_F 3E3N_G 3E3N_H	2QLM_A 3BCR_A 3BCS_A 3BCU_A 3BD6_A 3BD7_A 3BD8_A 3BDA_A 3CUT_A 3CUU_A 3CUW_A 3EBO_A 3EBP_A 3G2H_A 3G2I_A 3G2J_A 3G2K_A 3G2L_A 3G2N_A 5LRC_A 5LRE_A 5LRF_A 3MQF_A 3MRT_A 3MRV_A 3MRX_A 3MS7_A 3MSC_A 3MS2_A 3MS4_A 3MT7_A 3MT8_A 3MT9_A 3MTA_A 3MTB_A 3MTD_A 3NP7_A 3NP9_A 3NPA_A 5O50_A 2QLN_A 2QN1_A 2QN2_A 2QN3_A 2QNB_A 2QRM_A 2QRG_A 2QRH_A 3S0J_A 3SYM_A 3SYR_A 3T3D_A 3T3E_A 3T3G_A 3T3H_A 3T3I_A 2QRP_A …
P00492	104	123	104	123	1BZY_A	1BZY_A 1BZY_B 1BZY_C 1BZY_D 4RAB_A 4RAB_B 4RAB_C 4RAB_D 4RAC_A 4RAC_B 4RAC_C 4RAC_D 4RAD_A 4RAD_B 4RAD_C 4RAD_D 4RAD_E 4RAD_F 4RAD_G 4RAD_H 4RAN_A 4RAN_B 4RAN_C 4RAN_D 4RAO_B 4RAO_C 4RAO_D 4RAQ_B 4RAQ_D	4KN6_A
P00514	237	242	236	241	3FHI_B	3FHI_B	3PLQ_A
P00766	11	15	11	15	1GL1_B	1GL1_B 2CGA_B	1GCD_A 1K2I_1
P02699	327	348	327	348	1HZX_A	1HZX_A 1L9H_A 1U19_A 2G87_A 2HPY_A 2PED_A	3C9L_A 3PXO_A 5TE3_A
P06730	206	210	206	210	2W97_A	2W97_A 3U7X_A 3U7X_B 4AZA_A	1IPC_A
P07607	1	13	1	13	4EB4_A	4EB4_A 4EB4_B 4EB4_C 4EB4_D	4EZ8_A
P09391	245	250	245	250	5MT6_A	5MT6_A 5MT7_A 5MT8_A	2O7L_A 3ZMI_A 4H1D_A
P0C6U8	3542	3546	302	306	3SND_B	3SND_B 3VB3_B 3VB4_B 3VB5_B 3VB6_B 3VB7_B	2BX4_A
P12004	256	260	256	260	1U76_A	1U76_A 1U76_C 1U76_E 1UL1_A 1UL1_B 1VYJ_A 1VYJ_C 1VYJ_E 1VYJ_G 1VYJ_I 1VYJ_K 3P87_A 3P87_B 3P87_C 3P87_D 3P87_E 3P87_F 5MLW_E	3VKX_A
P15369	130	134	76	80	2IFW_A	2IFW_A 2IFW_B	1S2B_A
P22894	100	104	80	84	1JAN_A	1JAN_A	1JAO_A 1JAQ_A 1JJ9_A 1MMB_A
P29563	244	248	238	242	1VGO_B	1VGO_B 2Z55_A 2Z55_D	2EI4_A 3WQJ_A
P31153	116	126	116	126	4NDN_B	4NDN_B 4NDN_D	5A19_A
P38424	51	59	51	59	1SVW_B	1SVW_B	1SVI_A
P42336	414	418	414	418	4L1B_A	4L1B_A 4L23_A 4L2Y_A 5DXH_A	3ZIM_A 5DXT_A 5UBR_A
P42700	136	143	136	143	1YVP_A	1YVP_A 1YVP_B	1YVR_A
P43912	161	169	161	169	4MCB_B	4MCB_B	4MCD_A
P49137	216	229	216	229	2PZY_A	2PZY_A 3A2C_C 3A2C_E 3A2C_F 3A2C_G 3A2C_H 3A2C_I 3A2C_J 3A2C_L 3KC3_A 3KC3_B 3KC3_C 3KC3_E 3KC3_F 3KC3_H 3KC3_I 3KC3_J 3KC3_L 3R2B_A 3R2B_B 3R2B_C 3R2B_D 3R2B_G 3WI6_A 3WI6_B 3WI6_C 3WI6_D 3WI6_E 3WI6_F 4TYH_A	1NY3_A 3R2Y_A
P49137	236	240	236	240	2PZY_A	2PZY_A 2PZY_D 3A2C_A 3A2C_C 3A2C_D 3A2C_F 3A2C_G 3A2C_H 3A2C_I 3A2C_J 3A2C_K 3A2C_L 3KC3_A 3KC3_B 3KC3_C 3KC3_D 3KC3_E 3KC3_F 3KC3_G 3KC3_H 3KC3_I 3KC3_J 3KC3_K 3KC3_L 3R2B_L 4TYH_A	3R2Y_A
P52732	272	287	272	287	2FL2_A	2FL2_A 2FL6_A 2Q2Z_A 4A5Y_C 4BXN_A	3KEN_A 3ZCW_A 4A50_A 4BBG_A
P53779	369	382	369	382	3V6R_A	3V6R_A 3V6S_A 4H3B_A	1JNK_A 2EXC_X 2B1P_A 2O0U_A 2O2U_A 2ZDT_A 3TTI_A 4WHZ_A 2ZDU_A 3DA6_A 3FI3_A 3KVX_A 3OY1_A 3TTJ_A 4U79_A
P61964	24	30	24	30	4GM9_A	4GM9_A 4GM9_B	5VFC_A
P70731	38	53	38	53	3MHY_A	3MHY_A 3MHY_B 3MHY_C 4CNZ_A 4CNZ_C 4CNZ_D 4CNZ_E 4CNZ_F 4CO0_A 4CO0_B	4CNY_A
P71707	775	779	633	637	5CRF_A	5CRF_A 5CRF_B 5CRF_C	5CXW_A
Q02248	663	671	663	671	1M1E_A	1M1E_A	4EV8_A 4EV9_A 4EVP_A 4EVT_A
Q06755	227	232	227	232	5DDT_A	5DDT_A 5DDT_B	5DDV_A
Q09028	55	59	55	59	2XU7_B	2XU7_B 4PBY_B	3GFC_A
Q41460	1234	1240	1234	1240	3CNZ_A	3CNZ_A 3CNZ_B	1SDM_A
Q46893	229	235	229	235	3N9W_B	3N9W_B	1I52_A 1INI_A 1INJ_A
Q5JII7	3	10	3	10	3VYS_C	3VYS_C 3VYT_C	2Z1E_A
Q5JII7	15	19	15	19	3VYS_C	3VYS_C 3VYT_C	2Z1E_A 2Z1F_A
Q6ST21	273	287	273	287	2EPN_A	2EPN_A 2EPN_B 2EPO_A	2EPK_X 2EPL_X 2EPM_X
Q7KQK5	172	176	172	176	2Z8V_A	2Z8V_A 2Z8V_B 2Z8W_A 2Z8W_B	4R1B_A
Q7KQK5	352	356	352	356	2Z8W_A	2Z8W_A 4R19_B	4R1B_A
Q7KQK5	370	387	370	378	2Z8W_A	2Z8W_A 2Z8W_B	4R1B_A
Q84AF2	47	52	47	52	2P0J_A	2P0J_A	1SDO_A
Q89ZI2	611	670	590	649	4UR9_A	4UR9_A 4UR9_B 5FL0_A 5FL0_B 5FL1_A 5FL1_B	2J47_A 2W4X_A 2WCA_A 2VVS_A
Q8EMJ9	375	387	375	387	3ES7_A	3ES7_A 3ES7_B 3ES8_A 3ES8_B 3ES8_C 3ES8_D 3ES8_E 3ES8_F 3ES8_G 3ES8_H	3GD6_A
Q93DA8	145	151	145	151	3EXS_D	3EXS_D	3EXT_A
Q97UA0	90	98	85	93	3BQB_X	3BQB_X	2Q18_X 2Q19_X 2Q1D_X
Q9BX68	51	62	51	62	4NJZ_B	4NJZ_B 4NJZ_C	4NJY_A
Q9R194	248	257	248	257	4U8H_A	4U8H_A	4I6E_A
O76074	665	676	665	676	1UDU_A	1UDU_A 1UDU_B 2H42_B	1UDT_A 1UHO_A 4MD6_A
P18206	1117	1122	1117	1122	5L0D_A	5L0D_A 5L0D_D	3MYI_A
P29476	339	347	339	347	4JSE_B	4JSE_B	5FVO_A
P49137	153	158	153	158	3R2B_C	3R2B_C 3R2B_E 3R2B_F 3R2B_I 3R2B_J	1NY3_A 3R2Y_A
P53779	211	224	211	224	3V6R_A	3V6R_A 3V6S_A	1JNK_A 3TTI_A 3TTJ_A 4WHZ_A 2ZDT_A 2B1P_A 2EXC_X 2O2U_A 2ZDU_A 2O0U_A 3DA6_A 3FI3_A 3KVX_A 3OY1_A 4U79_A
P68135	3	7	1	5	3M1F_A	3M1F_A	3M6G_A 3M6G_B 2Q0R_A
Q09028	2	15	2	15	4PBY_A	4PBY_A	3GFC_A
Q84B82	46	50	46	50	3TCJ_B	3TCJ_B	3JRZ_A 3JSC_A
